# Supplementary material
Source: PubMed Central journal article supplement (PMC2518172)

## Supporting Information

### Development of a Small Peptide Tag for Covalent Labeling of Proteins

Fujie Tanaka,\* Roberta Fuller, Lily Asawapornmongkol, Axel Warsinke,

Sarah Gobuty, and Carlos F. Barbas, III\*

The Departments of Molecular Biology and Chemistry and The Skaggs Institute for Chemical Biology, The Scripps Research Institute, 10550 North Torrey Pines Road, La Jolla, California 92037

**Scheme S1.** Synthesis of **1-Biotin**

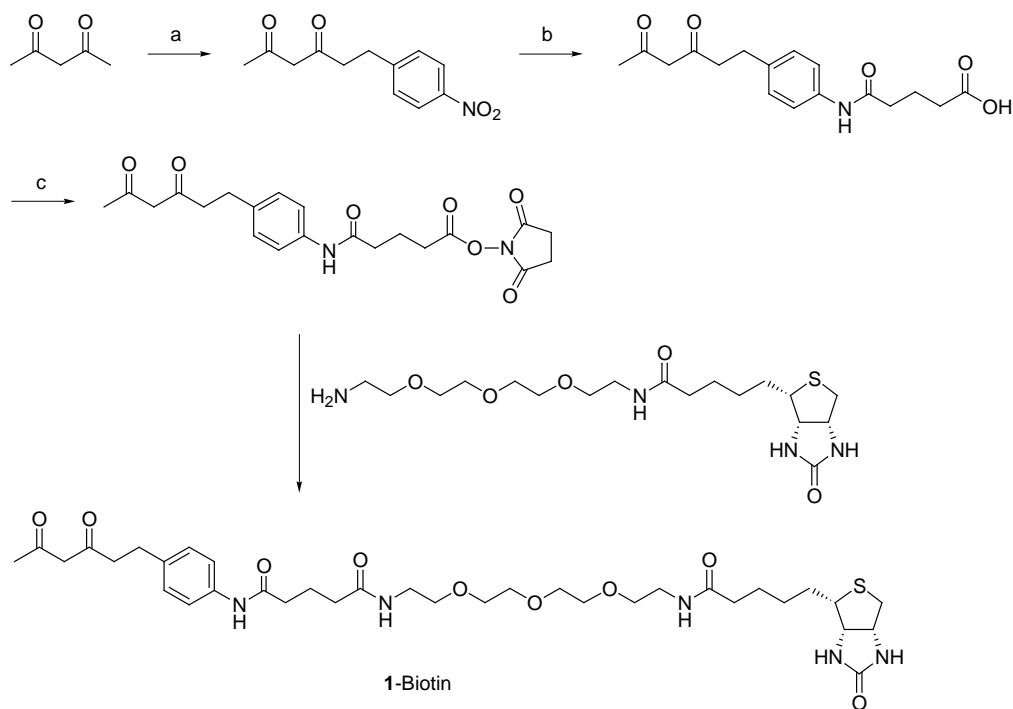

(a) (1) LDA, (2) *p*-nitrobenzyl bromide; (b) (1) Pd-C/H<sub>2</sub>, (2) glutaric anhydride; (c) EDC, *N*-hydroxysuccinimide. For steps a-c, see Wagner, J., Lerner, R. A., Barbas, C. F., III. *Science* 270, 1797-1800 (1995).

# MALDI-TOF REFLECTRON

Original Filename: e:\data\routine\2004\july\072904\8359.ms

This File # 2 : E:\DATA\ROUTINE\2004\JULY\072904\SMOOTH.MS

Comment:

Savitsky-Golay Order = 2 Points = 19 Method: RDE2000K

Mode: Reflector

Accelerating Voltage: 20000

Grid Voltage: 72.000 %

Guide Wire Voltage: 0.030 %

Delay: 100 ON

Sample: 17

Laser : 1880

Scans Averaged: 143

Pressure: 4.07e-07

Low Mass Gate: 400.0

Timed Ion Selector: 180.0 OFF

Negative Ions: OFF

Collected: 7/30/04 4:19 AM

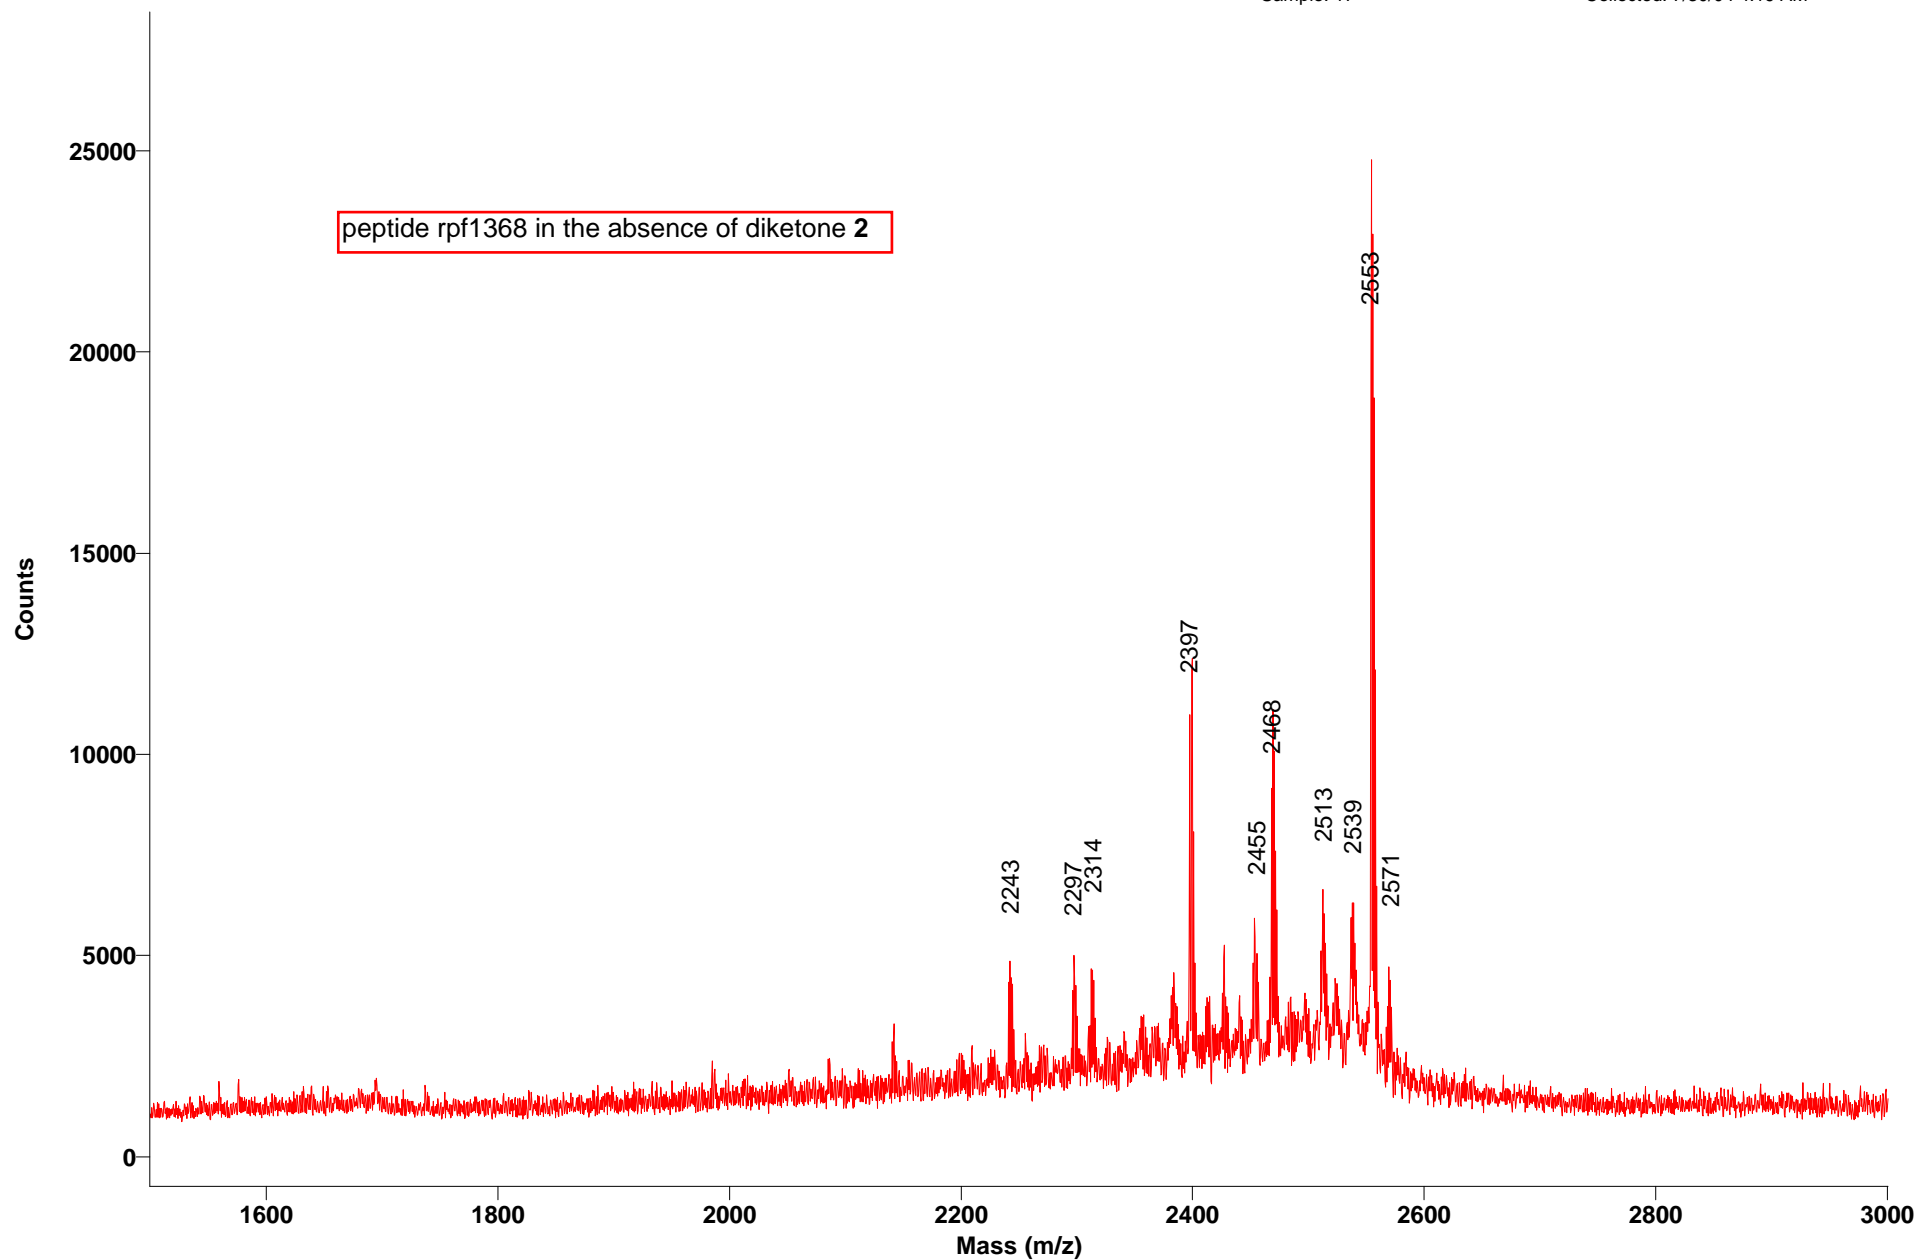

# MALDI-TOF REFLECTRON

Original Filename: e:\data\routine\2004\july\072904\8359.ms

This File # 2 : E:\DATA\ROUTINE\2004\JULY\072904\SMOOTH.MS

Comment:

Savitsky-Golay Order = 2 Points = 19 Method: RDE2000K

Mode: Reflector

Accelerating Voltage: 20000

Grid Voltage: 72.000 %

Guide Wire Voltage: 0.030 %

Delay: 100 ON

Sample: 17

Laser : 1880

Scans Averaged: 143

Pressure: 4.07e-07

Low Mass Gate: 400.0

Timed Ion Selector: 180.0 OFF

Negative Ions: OFF

Collected: 7/30/04 4:19 AM

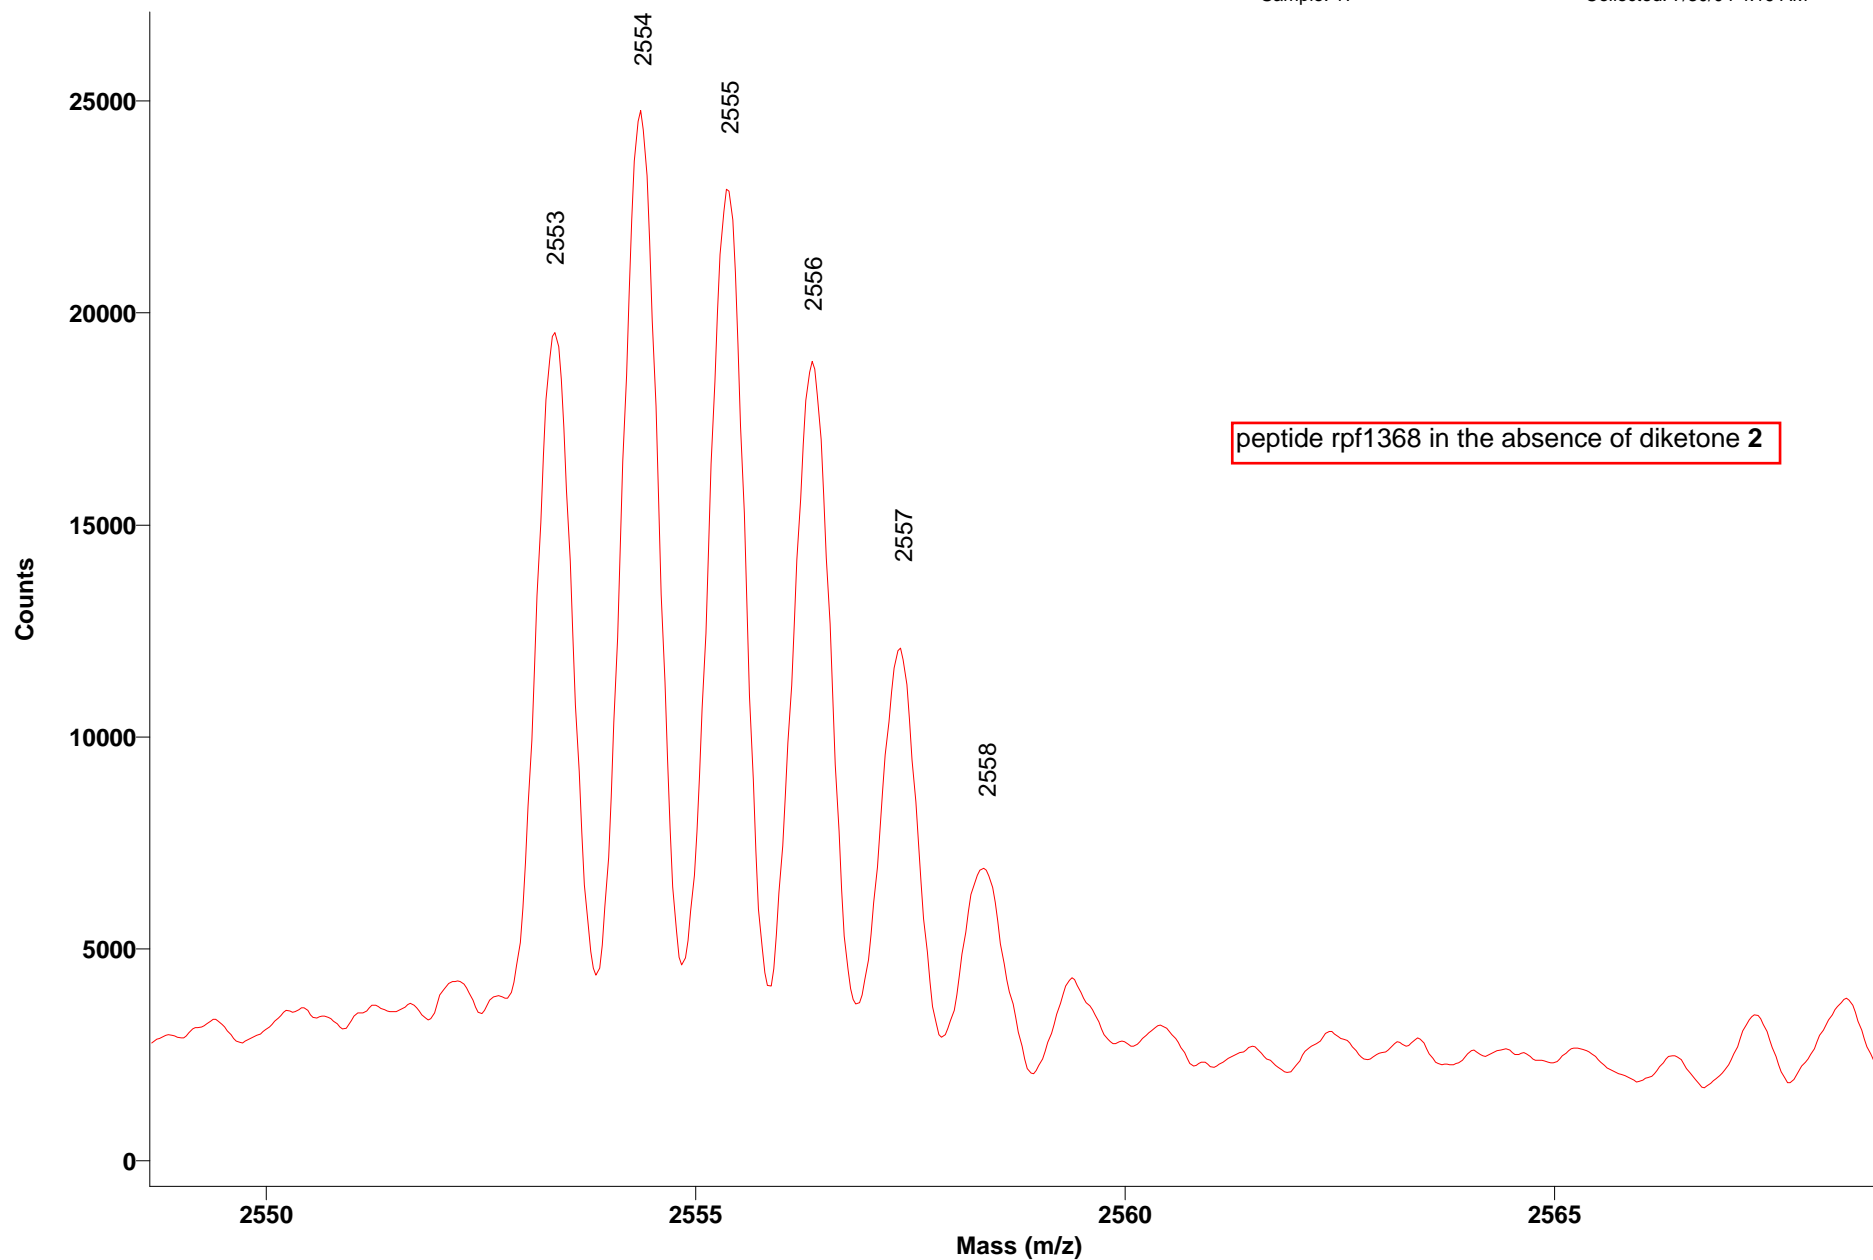

# MALDI-TOF REFLECTRON

Original Filename: e:\data\routine\2004\july\072904\8358.ms

This File # 1 : E:\DATA\ROUTINE\2004\JULY\072904\SMOOTH.MS

Comment:

Savitsky-Golay Order = 2 Points = 19 Method: RDE2000K

Mode: Reflector

Accelerating Voltage: 20000

Grid Voltage: 72.000 %

Guide Wire Voltage: 0.030 %

Delay: 100 ON

Sample: 18

Laser : 1880

Scans Averaged: 127

Pressure: 3.11e-07

Low Mass Gate: 400.0

Timed Ion Selector: 180.0 OFF

Negative Ions: OFF

Collected: 7/30/04 4:28 AM

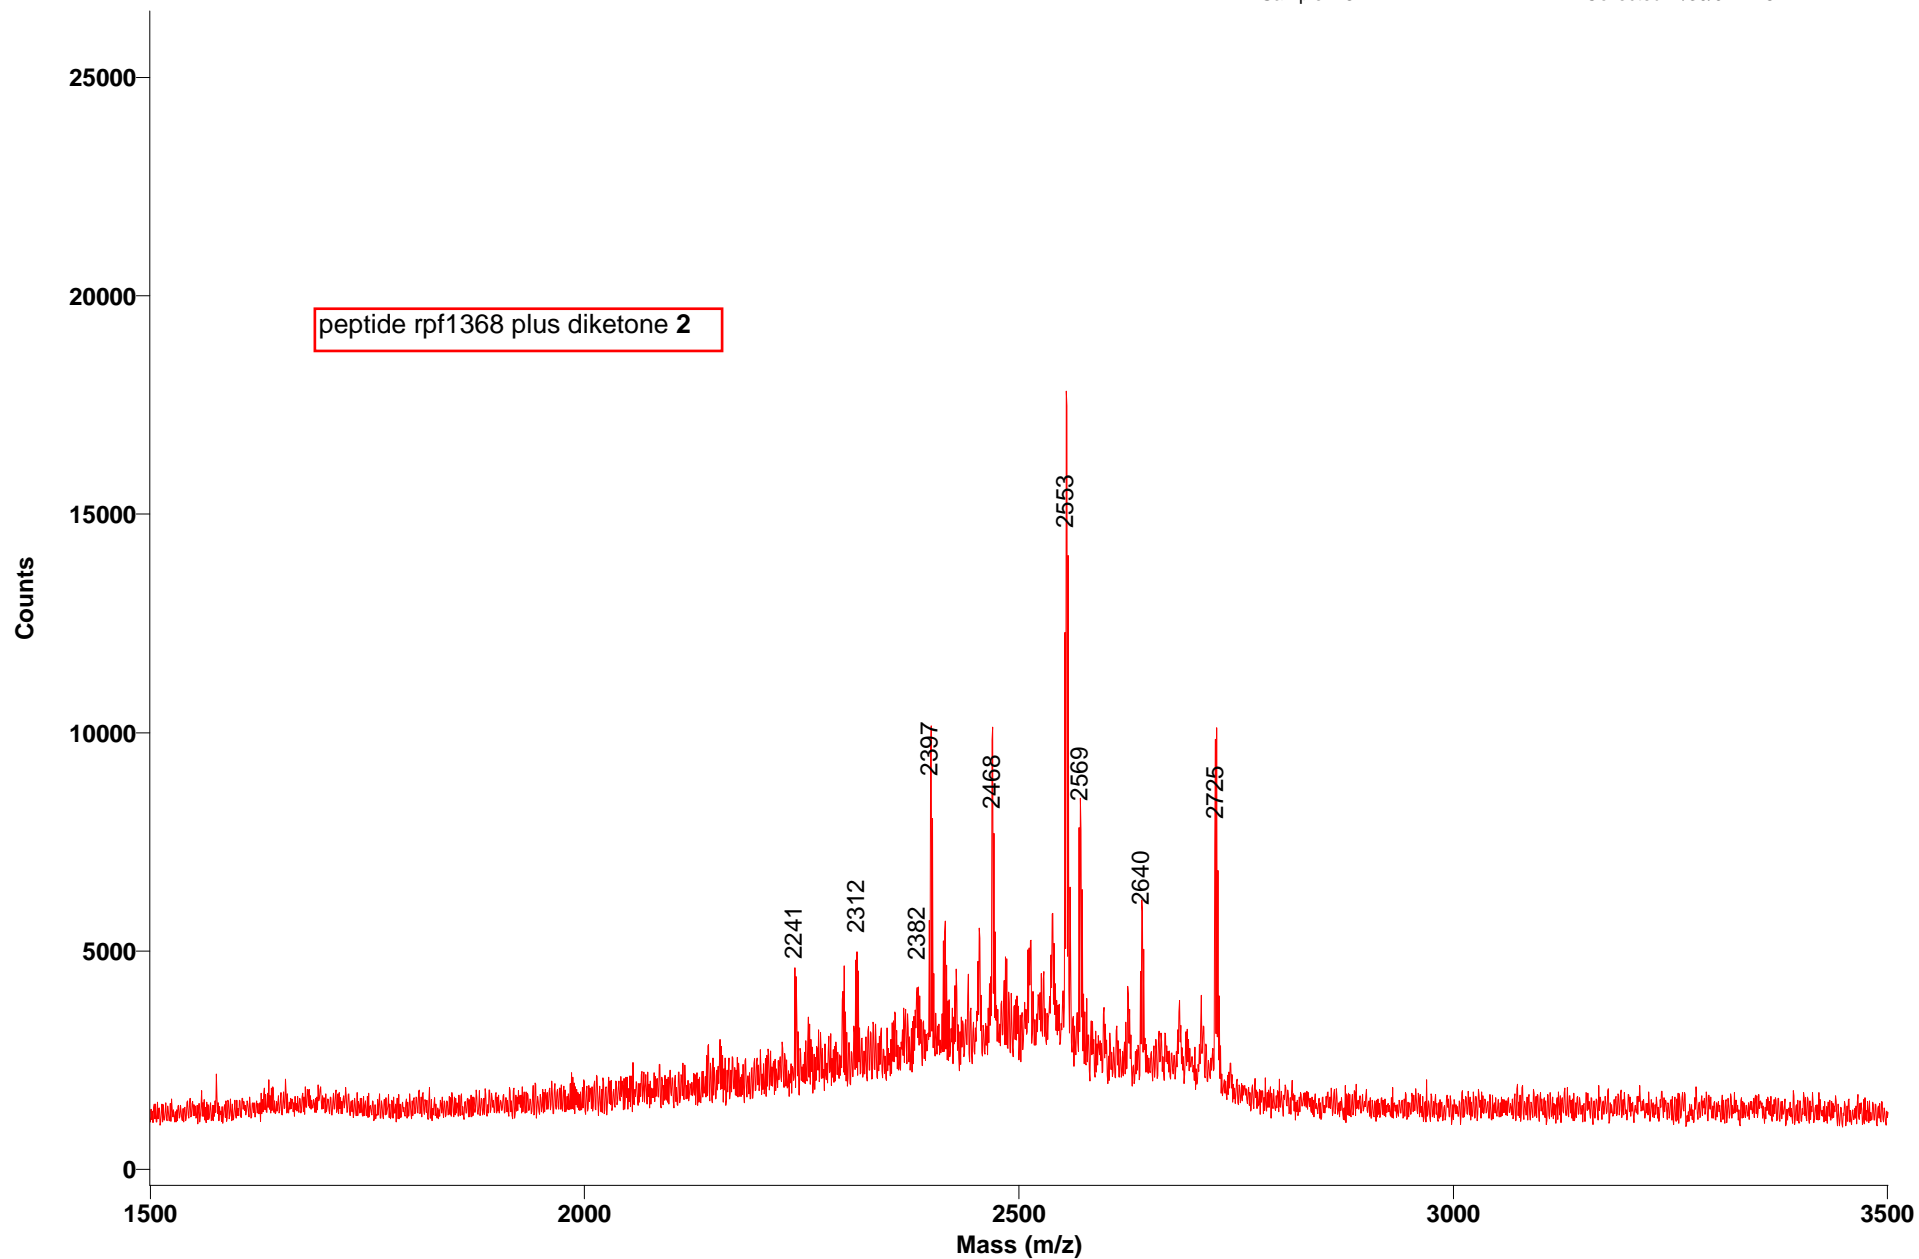

# MALDI-TOF REFLECTRON

Original Filename: e:\data\routine\2004\july\072904\8358.ms

This File # 1 : E:\DATA\ROUTINE\2004\JULY\072904\SMOOTH.MS

Comment:

Savitsky-Golay Order = 2 Points = 19 Method: RDE2000K

Mode: Reflector

Accelerating Voltage: 20000

Grid Voltage: 72.000 %

Guide Wire Voltage: 0.030 %

Delay: 100 ON

Sample: 18

Laser : 1880

Scans Averaged: 127

Pressure: 3.11e-07

Low Mass Gate: 400.0

Timed Ion Selector: 180.0 OFF

Negative Ions: OFF

Collected: 7/30/04 4:28 AM

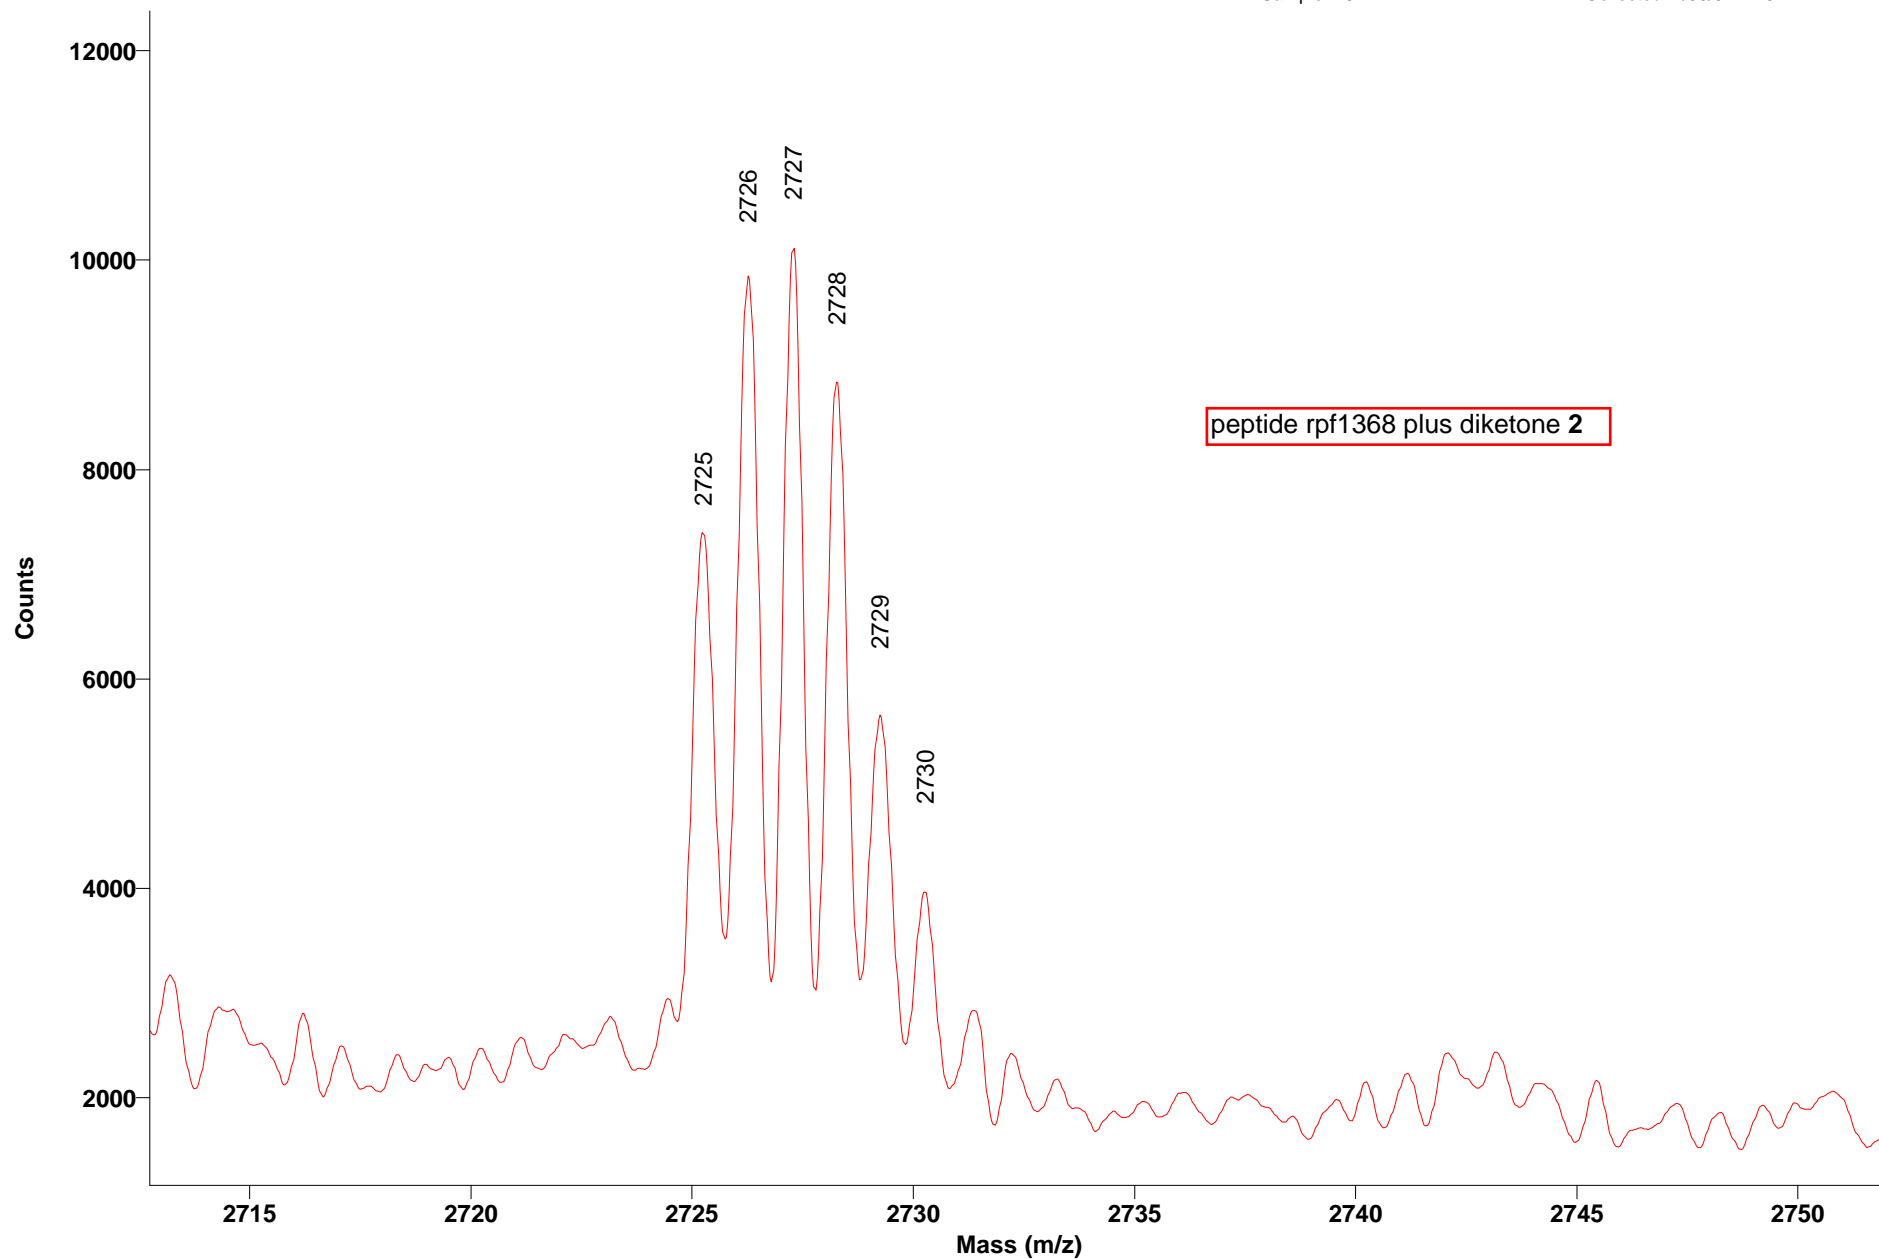

Supplement: NIHMS62550-supplement-1File002.pdf [file NIHMS62550-supplement-1File002.pdf]
